# Supplementary material for: A template oriented one-dimensional Schiff-base polymer: towards flexible nitrogen-enriched carbonaceous electrodes with ultrahigh electrochemical capacity
Source: Royal Society of Chemistry journal article supplement (doi:10.1039/d1nr05618b), 2021-01-01
Supplement: d1nr05618b1.pdf [file d1nr05618b1.pdf]

Supporting information for

**Template Orienting One-Dimensional Schiff-Base Polymer: towards Flexible Nitrogen-enriched Carbonaceous Electrodes with Ultrahigh Electrochemical Capacity**

Zhichang Xiao,<sup>\*a</sup> Junwei Han,<sup>c</sup> Haiyong He,<sup>d</sup> Xinghao Zhang,<sup>b</sup> Jing Xiao,<sup>c</sup> Daliang Han,<sup>c</sup> Debin Kong,<sup>\*c</sup> Bin Wang,<sup>b</sup> Quan-Hong Yang,<sup>c</sup> and Linjie Zhi <sup>\*b</sup>

<sup>a</sup>Department of Chemistry, College of Science, Hebei Agricultural University, Baoding 071001, P. R. China

<sup>b</sup>CAS Key Laboratory of Nanosystem and Hierarchical Fabrication, CAS Center for Excellence in Nanoscience, National Center for Nanoscience and Technology, Beijing 100190, P. R. China

<sup>c</sup>Nanoyang Group, State Key Laboratory of Chemical Engineering, School of Chemical Engineering and Technology, Collaborative Innovation Center of Chemical Science and Engineering (Tianjin), Tianjin University, Tianjin 300350, P. R. China

<sup>d</sup>Ningbo Institute of Materials Technology and Engineering, Chinese Academy of Sciences, Ningbo, 315201, P. R. China

<sup>e</sup>College of New Energy, China University of Petroleum (East China), Qingdao, P. R. China.

\*Corresponding author. E-mail: zhilj@nanoctr.cn (Linjie Zhi); kongdb@upc.edu.cn (Debin Kong); xiaozhichangcnu@sina.cn (Zhichang Xiao).

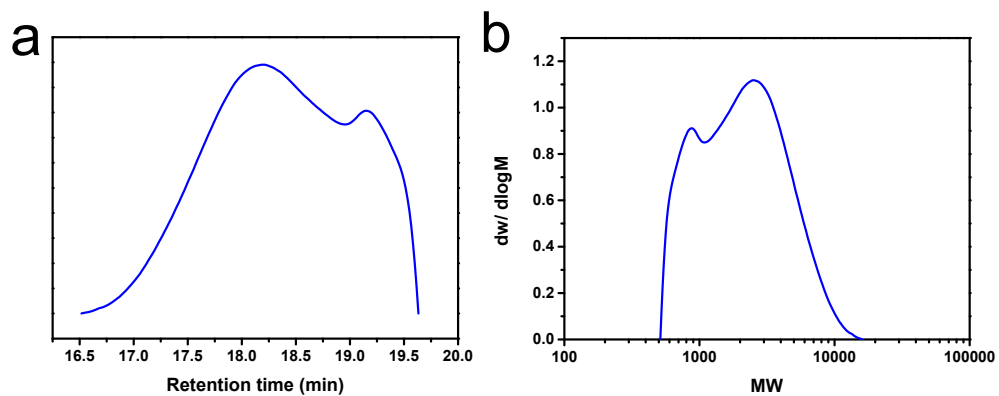

**Fig. S1** (a) GPC curve and (b) molecular weight distribution curve of SBO.

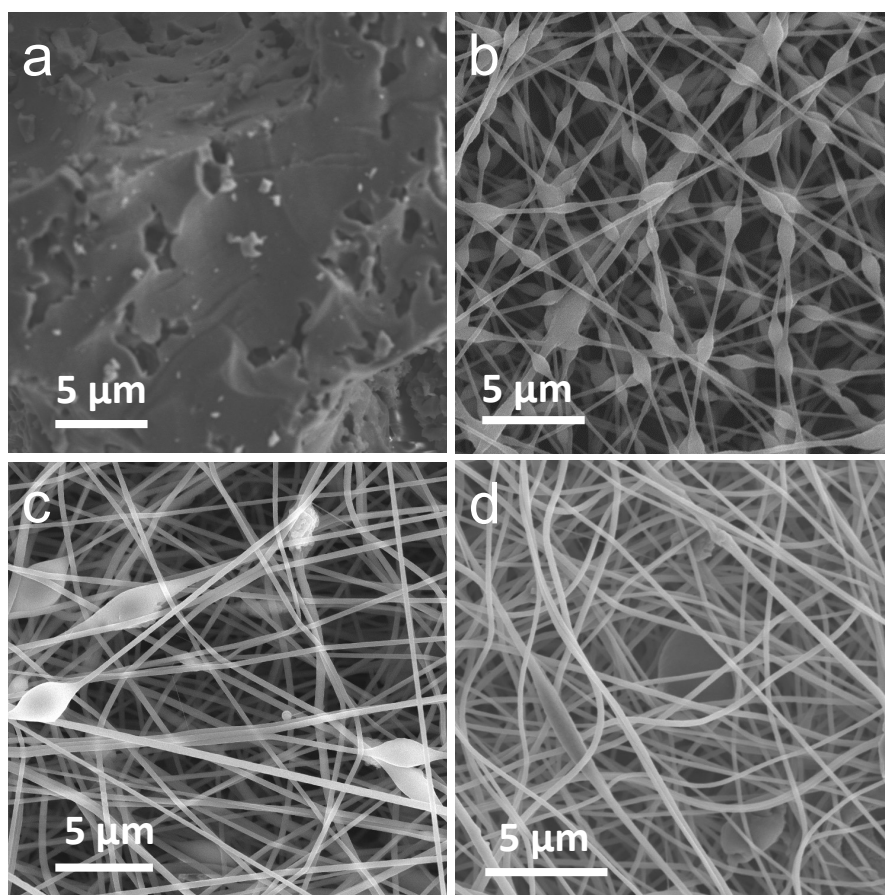

**Fig. S2** Investigation of morphological evolution with the variation of the volume ratio between PAN/ DMF and SBO. SEM images of (a) SBO, (b) PNF-2, (c) PNF-1.7 and (d) PNF-1.3.

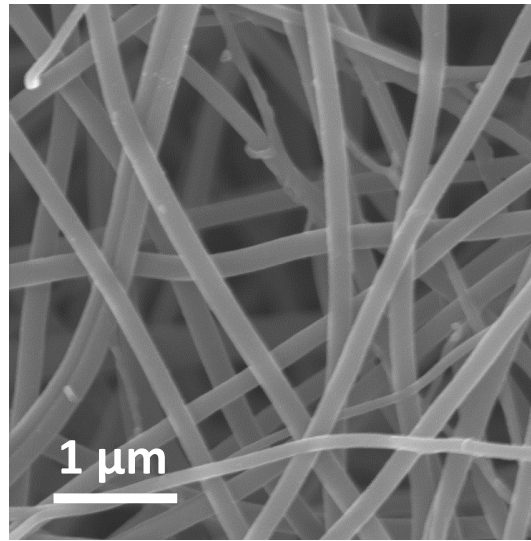

**Fig. S3** SEM image of PAN.

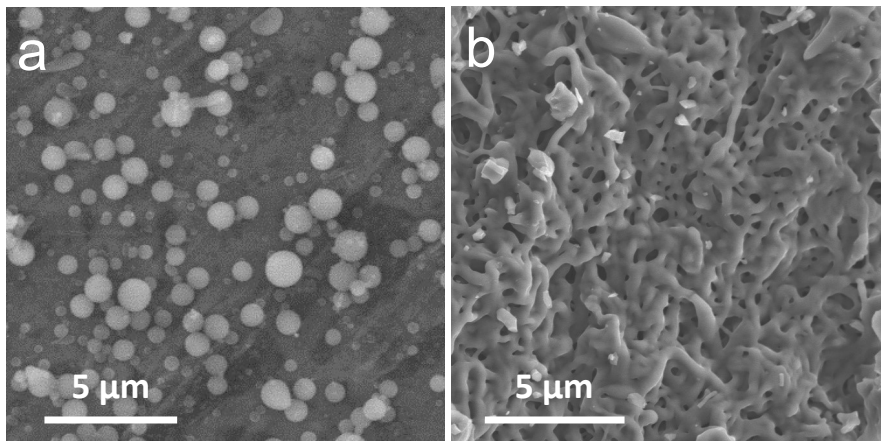

**Fig. S4** SEM images of (a) control sample 1 with insufficient reaction time; (b) control sample 2 without crosslinking reaction at 200 °C.

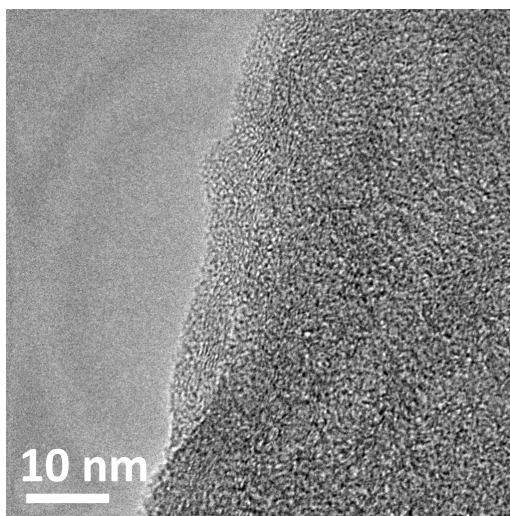

**Fig. S5** TEM image of NPCNF.

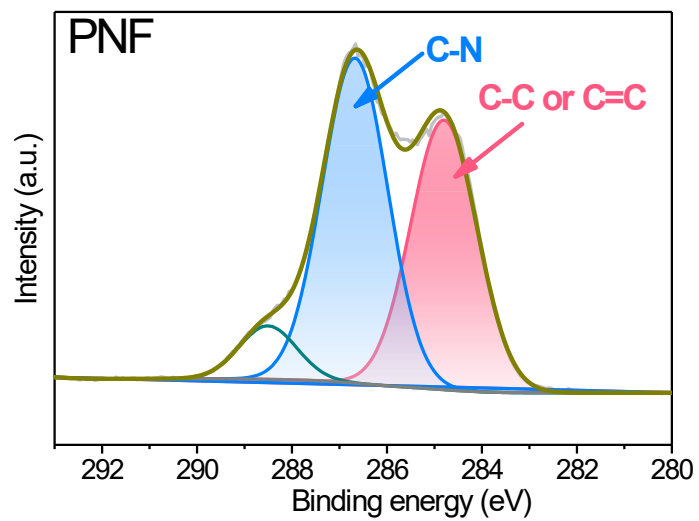

**Fig. S6** The high-resolution XPS spectrum of C 1s of PNF.

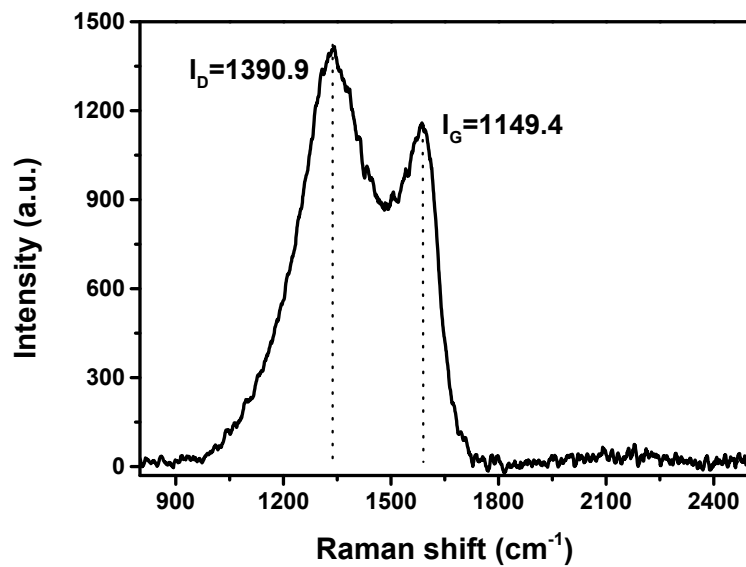

**Fig. S7** Raman spectrum of NPCNF.

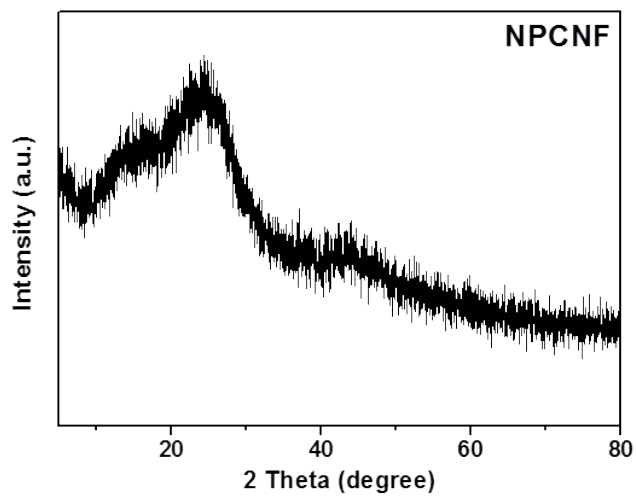

**Fig. S8** XRD pattern of NPCNF.

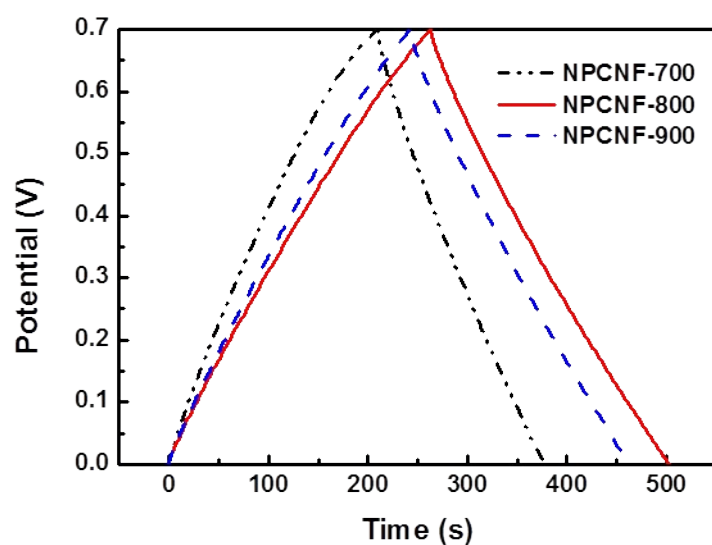

**Fig. S9** Comparison of electrochemical performance of NPCNF-700, NPCNF and NPCNF-900 measured in a three-electrode system at  $1 \text{ A g}^{-1}$ .

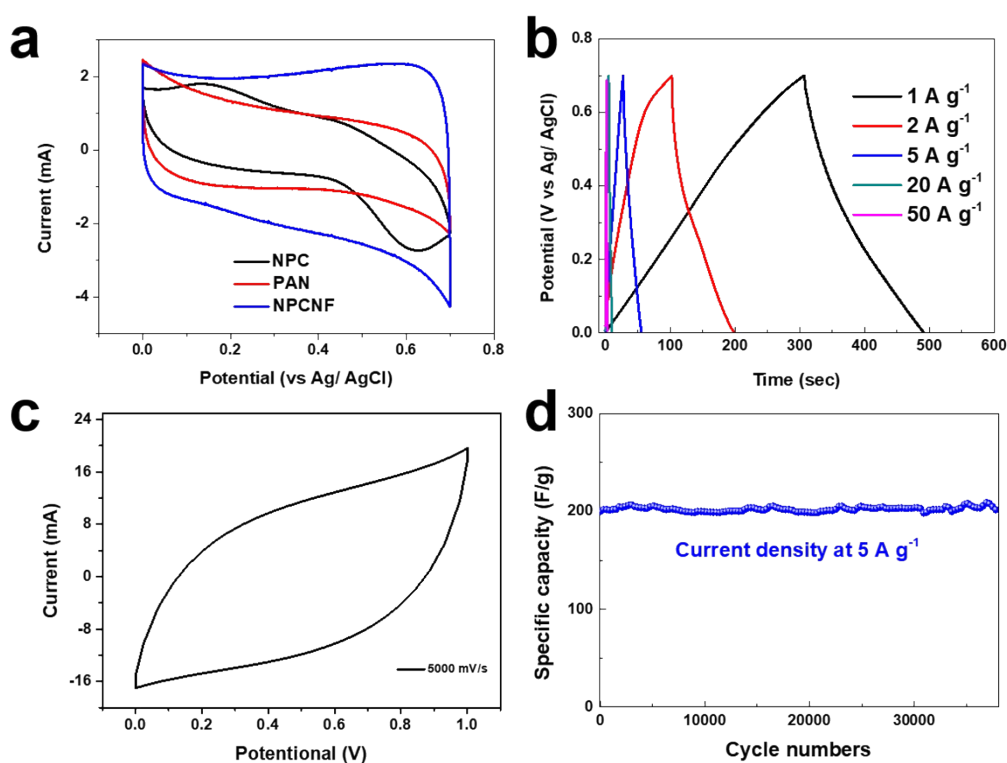

**Fig. S10** Electrochemical capacitive performances of NPC, PAN and NPCNF electrodes: comparison of a) CV curves at a scan rate of  $50 \text{ mV s}^{-1}$ ; b) CV curve of NPCNF in  $6 \text{ M KOH}$  at  $5000 \text{ mV s}^{-1}$ ; c) galvanostatic charge/ discharge curves at different current densities; d) cycling stability at a current density of  $5 \text{ A g}^{-1}$ .

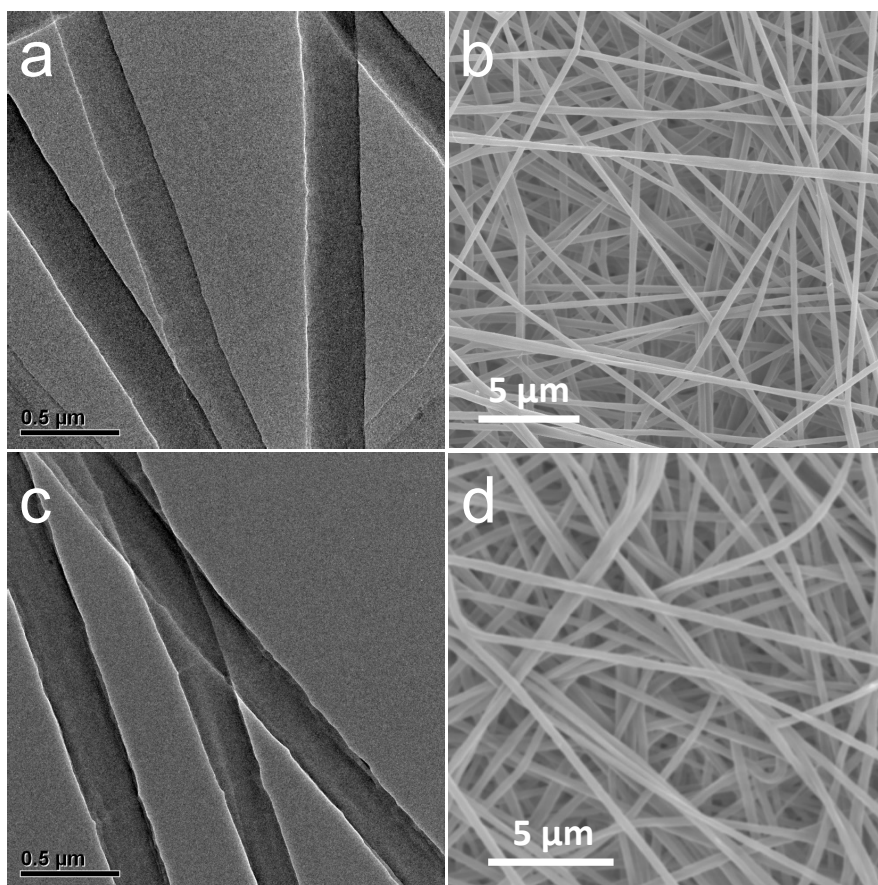

**Fig. S11** (a) TEM image and (b) SEM image of the pristine NPCNF electrode; (c) TEM image and (d) SEM image of the NPCNF electrode after a galvanostatic charge-discharge process at  $0.5 \text{ A g}^{-1}$  for 200 cycles.

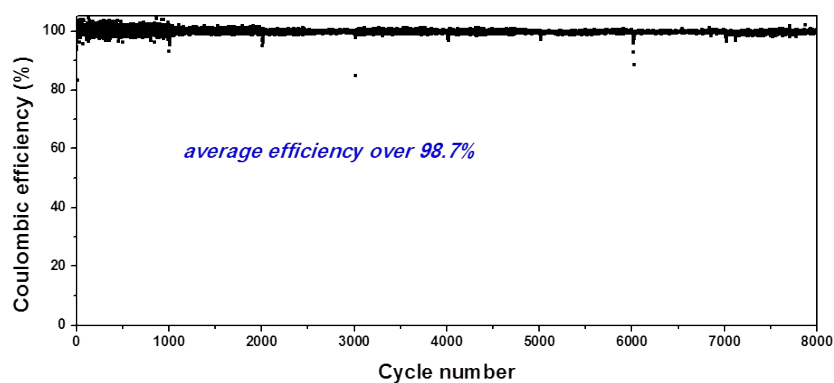

**Fig. S12** Corresponding coulombic efficiency of NPCNF// AC LIC for 8,000 cycles at  $5 \text{ A g}^{-1}$ .
